# Supplementary material for: Statins Promote the Regression of Atherosclerosis via Activation of the CCR7-Dependent Emigration Pathway in Macrophages
Source: PubMed Central journal article supplement (PMC3232231; doi:10.1371/journal.pone.0028534), 2011-12-06
Supplement: pone.0028534.s001.pdf [file pone.0028534.s001.pdf]

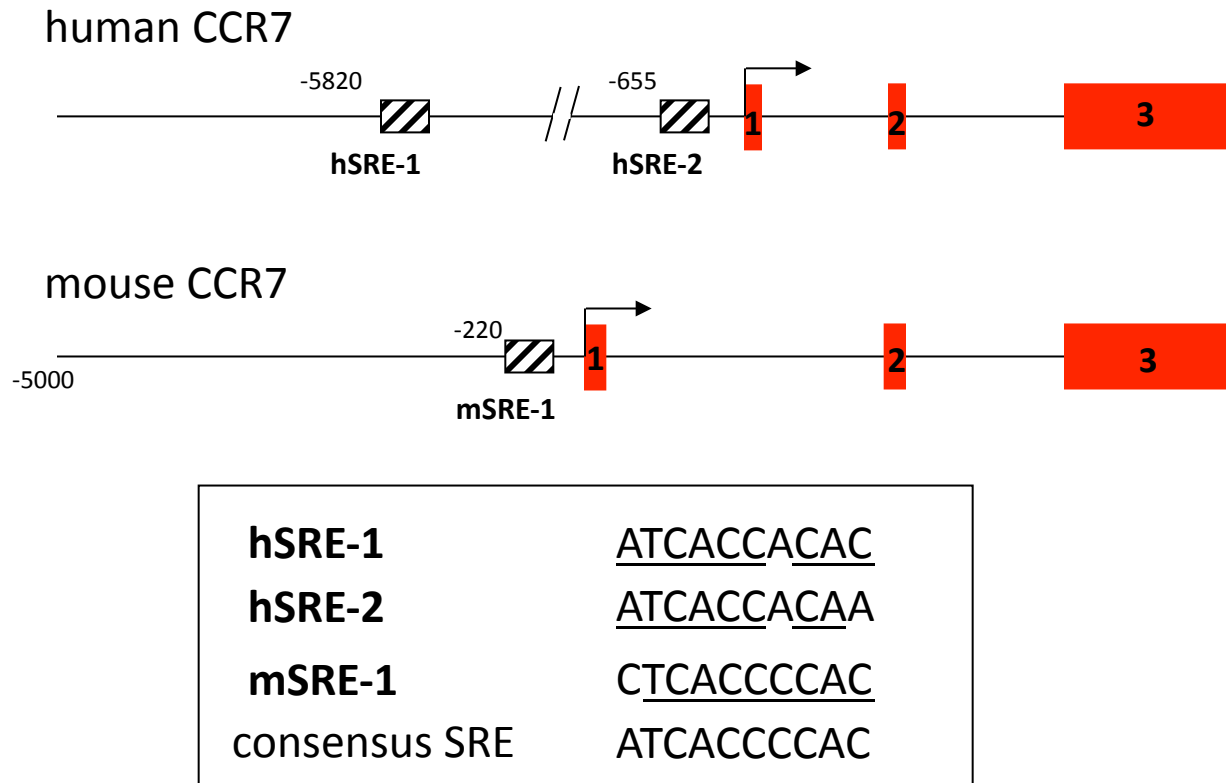

**Supplementary Figure 1. Organization of the CCR7 gene and location of predicted sterol response elements (SRE)**

To identify potential binding sites for transcription factors that may be important in the regulation of CCR7 gene expression, 6 Kb of the human and mouse CCR7 upstream regulatory regions were analyzed by MatInspector (Bioinformatics. 2005; 21:2933-42). This revealed a conserved sterol responsive element (SRE), in both human and mouse CCR7.
