# Supplementary material for: Statins Promote the Regression of Atherosclerosis via Activation of the CCR7-Dependent Emigration Pathway in Macrophages
Source: PubMed Central journal article supplement (PMC3232231; doi:10.1371/journal.pone.0028534), 2011-12-06
Supplement: pone.0028534.s003.pdf [file pone.0028534.s003.pdf]

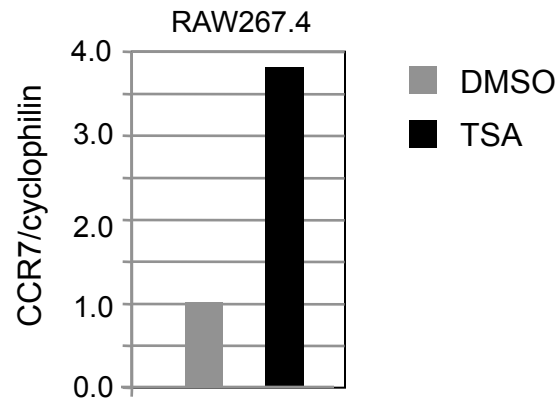

**Supplementary Figure 3. The histone deacetylase inhibitor trichostatin A (TSA) induces CCR7 mRNA expression.** RAW macrophages were incubated for 24h in medium with 1% FBS and DMSO vehicle or 20ng/ml TSA for 24 h. Transcripts were analyzed by real time Q-PCR. Values indicate expression of CCR7 normalized to cyclophilin and levels are presented as fold induction relative to the expression in DMSO-treated cells, which was arbitrarily set to 1.
